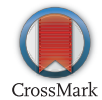

# Professional Practice Committee for the *Standards of Medical Care in Diabetes—2016*

*Diabetes Care* 2016;39(Suppl. 1):S107–S108 | DOI: 10.2337/dc16-S018

**Committee members disclosed the following financial or other conflicts of interest covering the period of 12 months before December 2015**

| Member                                           | Employment                                                                                                                                                   | Industry-sponsored research grant                  | Other research support |
|--------------------------------------------------|--------------------------------------------------------------------------------------------------------------------------------------------------------------|----------------------------------------------------|------------------------|
| William H. Herman, MD, MPH<br>(Chair)            | University of Michigan, Ann Arbor, MI                                                                                                                        | None                                               | None                   |
| Thomas W. Donner, MD                             | Johns Hopkins University School of Medicine, Baltimore, MD                                                                                                   | Novo Nordisk*#                                     | None                   |
| R. James Dudl, MD                                | Kaiser Permanente, Bonita, CA                                                                                                                                | None                                               | None                   |
| Hermes J. Florez, MD, PhD, MPH                   | University of Miami and GRECC-Miami VA Healthcare System, Miami, FL                                                                                          | None                                               | None                   |
| Judith E. Fradkin, MD                            | National Institutes of Health, Bethesda, MD                                                                                                                  | None                                               | None                   |
| Charlotte A. Hayes, MMSc, MS, RD, CDE, ACSM CCEP | Private practices: (NF) <sup>2</sup> Nutrition and Fitness Consulting, Atlanta, GA                                                                           | None                                               | None                   |
| Rita Rastogi Kalyani, MD, MHS, FACP              | Johns Hopkins University, Baltimore, MD                                                                                                                      | None                                               | None                   |
| Suneil Koliwad, MD, PhD                          | University of California, San Francisco, San Francisco, CA                                                                                                   | None                                               | None                   |
| Joseph A. Stankaitis, MD, MPH                    | Monroe Plan for Medical Care, Pittsford, NY; YourCare Health Plan, Buffalo, NY                                                                               | None                                               | None                   |
| Tracey H. Taveira, PharmD, CDOE, CVDOE           | University of Rhode Island College of Pharmacy, Kingston, RI; Providence VA Medical Center, Warren Alpert Medical School of Brown University, Providence, RI | None                                               | None                   |
| Deborah J. Wexler, MD, MSc                       | Massachusetts General Hospital, Boston, MA                                                                                                                   | U01DK098246—GRADE R18DK102737—REAL HEALTH-Diabetes | None                   |
| Joseph Wolfsdorf, MB, BCh                        | Boston Children's Hospital, Boston, MA                                                                                                                       | None                                               | None                   |
| Jane L. Chiang, MD (Staff)                       | American Diabetes Association, Alexandria, VA                                                                                                                | None                                               | None                   |
| Erika Gebel Berg, PhD (Staff)                    | American Diabetes Association, Alexandria, VA                                                                                                                | None                                               | None                   |
| Allison T. McElvaine, PhD (Staff)                | American Diabetes Association, Alexandria, VA                                                                                                                | None                                               | None                   |

DSMB, Data and Safety Monitoring Board; GRECC, Geriatric Research Education and Clinical Center; MEDCAC, Medicare Evidence Development & Coverage Advisory Committee.

\*≥\$10,000 per year from company to individual.

#Grant or contract is to university or other employer.

| Member | Speakers' bureau/<br>honoraria     | Ownership interest | Consultant/advisory board                                                          | Other                                                                                                                                                                                                                                                                                                                                            |
|--------|------------------------------------|--------------------|------------------------------------------------------------------------------------|--------------------------------------------------------------------------------------------------------------------------------------------------------------------------------------------------------------------------------------------------------------------------------------------------------------------------------------------------|
| W.H.H. | None                               | None               | Merck Sharp & Dohme<br>(Chair, DSMB),* Lexicon<br>Pharmaceuticals<br>(Chair, DSMB) | National Committee for Quality Assurance<br>(Chair, Diabetes Panel), Centers for Medicare<br>& Medicaid Services (member, MEDCAC),<br><i>Diabetic Medicine</i> (Editor for the Americas),<br><i>Diabetes Care</i> (ad hoc Editor in Chief)                                                                                                       |
| T.W.D. | None                               | None               | None                                                                               | None                                                                                                                                                                                                                                                                                                                                             |
| R.J.D. | None                               | None               | None                                                                               | None                                                                                                                                                                                                                                                                                                                                             |
| H.J.F. | None                               | None               | None                                                                               | None                                                                                                                                                                                                                                                                                                                                             |
| J.E.F. | None                               | None               | None                                                                               | None                                                                                                                                                                                                                                                                                                                                             |
| C.A.H. | Scherer Clinical<br>Communications | None               | Emory University: Emory at<br>Grady Diabetes Course                                | Receives royalties from the American<br>Diabetes Association, Academy of Nutrition<br>and Dietetics (Chair, Legislative and Public<br>Policy Committee)                                                                                                                                                                                          |
| R.R.K. | None                               | None               | AstraZeneca (Advisory<br>Group member)                                             | <i>Diabetes Care</i> (Editorial Board)                                                                                                                                                                                                                                                                                                           |
| S.K.   | None                               | Yes Health         | None                                                                               | None                                                                                                                                                                                                                                                                                                                                             |
| J.A.S. | None                               | None               | None                                                                               | National Committee for Quality Assurance<br>(physician surveyor and member of the<br>Reconsideration Committee), New York State<br>Department of Health Medicaid Redesign<br>Team's Evidence-Based Benefit Review<br>Workgroup, Board member for St. Ann's<br>Community, Rochester, NY, a nonprofit<br>senior living/long-term care organization |
| T.H.T. | None                               | None               | None                                                                               | None                                                                                                                                                                                                                                                                                                                                             |
| D.J.W. | None                               | None               | None                                                                               | <i>Diabetes Care</i> (Editorial Board),<br>PracticeUpdate: Diabetes (Editorial Board)                                                                                                                                                                                                                                                            |
| J.W.   | None                               | None               | None                                                                               | <i>Diabetes Care</i> , <i>Hormone Research in<br/>Paediatrics</i> , and <i>Pediatric Diabetes</i> (Editorial<br>Board); UpToDate (Section Editor)                                                                                                                                                                                                |
| J.L.C. | None                               | None               | None                                                                               | None                                                                                                                                                                                                                                                                                                                                             |
| E.G.B. | None                               | None               | None                                                                               | None                                                                                                                                                                                                                                                                                                                                             |
| A.T.M. | None                               | None               | None                                                                               | None                                                                                                                                                                                                                                                                                                                                             |
